# Supplementary material for: Apatinib triggers autophagic and apoptotic cell death via VEGFR2/STAT3/PD-L1 and ROS/Nrf2/p62 signaling in lung cancer
Source: PubMed Central journal article supplement (PMC8385858; doi:10.1186/s13046-021-02069-4), 2021-08-24

Supplementary. Raw data for the blots included in each figure.

For Figure 2C.

For Figure 2E.

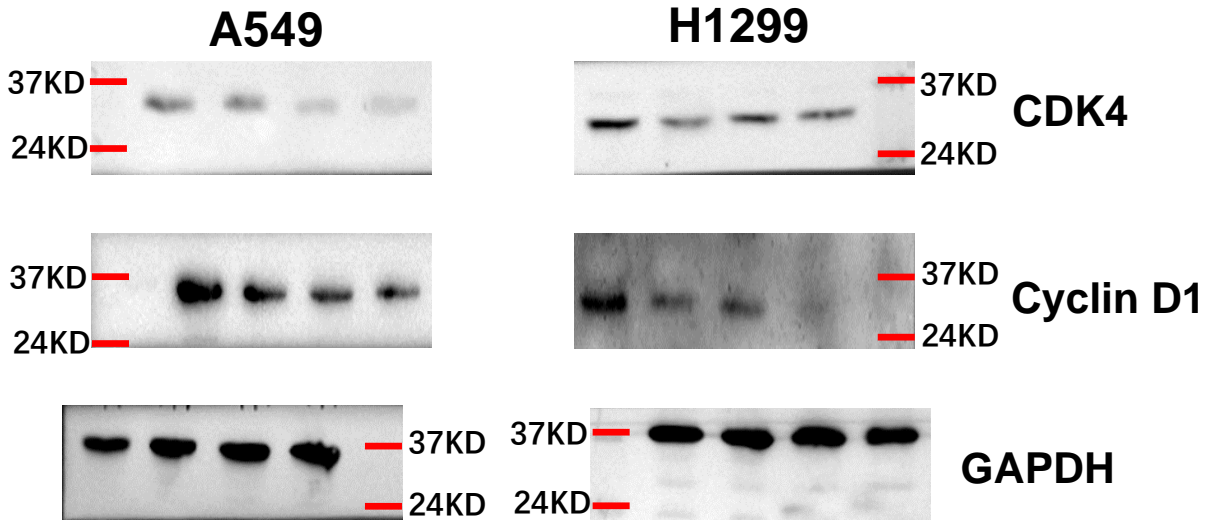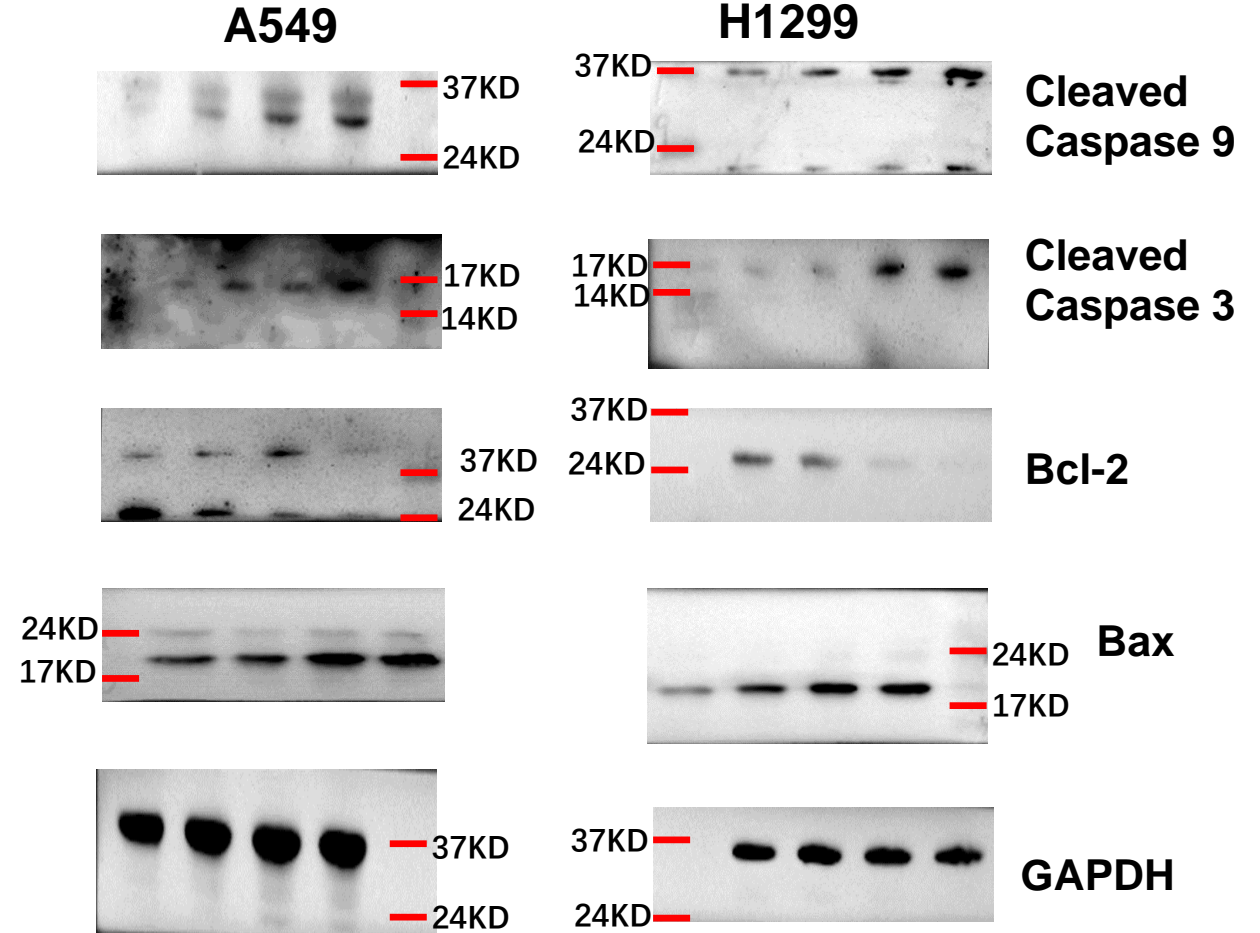

**Supplementary. Raw data for the blots included in each figure.**

**For Figure 4G.**

**A549**

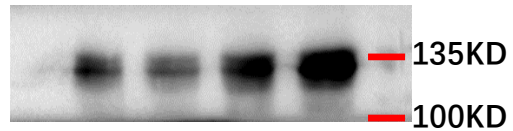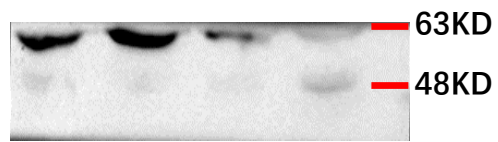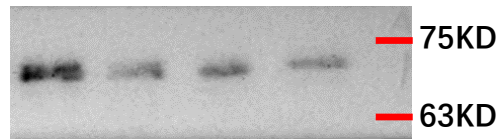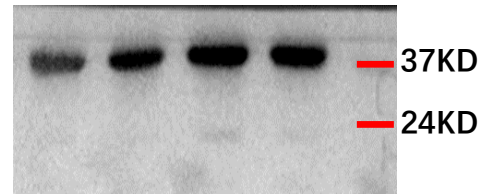

**H1299**

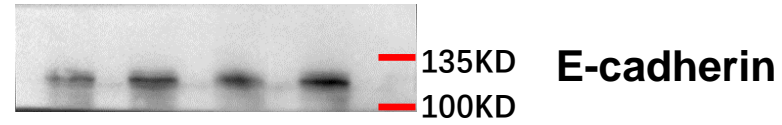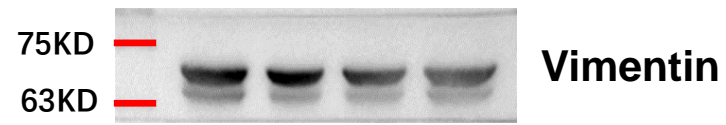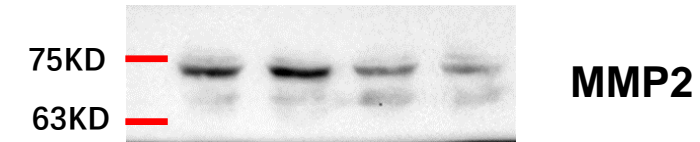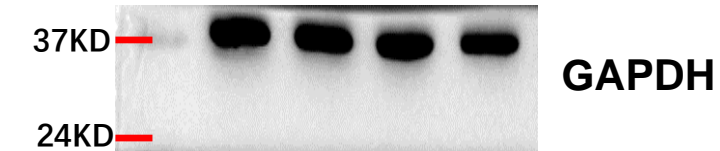

**Supplementary. Raw data for the blots included in each figure.**

**For Figure 5A.**

**A549**

**H1299**

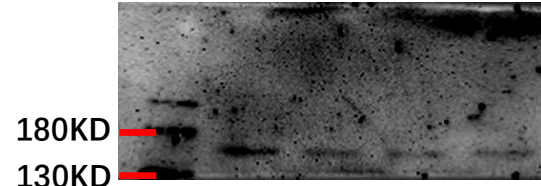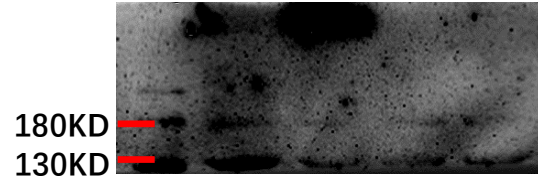

**p-VEGFR2**

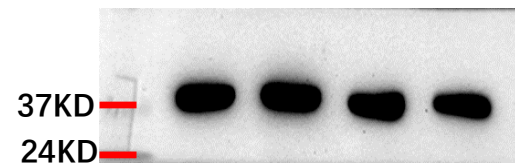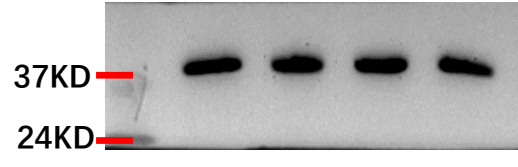

**GAPDH**

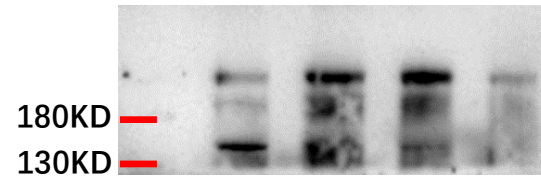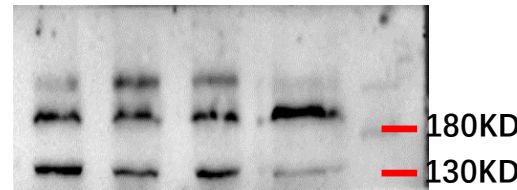

**VEGFR2**

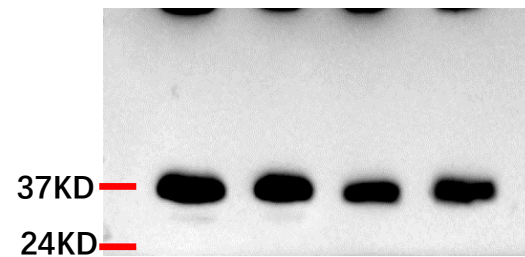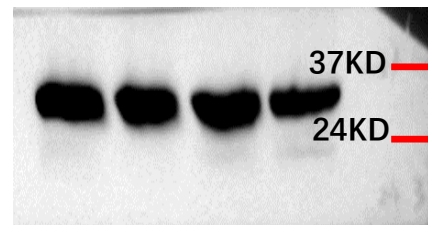

**GAPDH**

**Supplementary. Raw data for the blots included in each figure.**

**For Figure 5B.**

**A549**

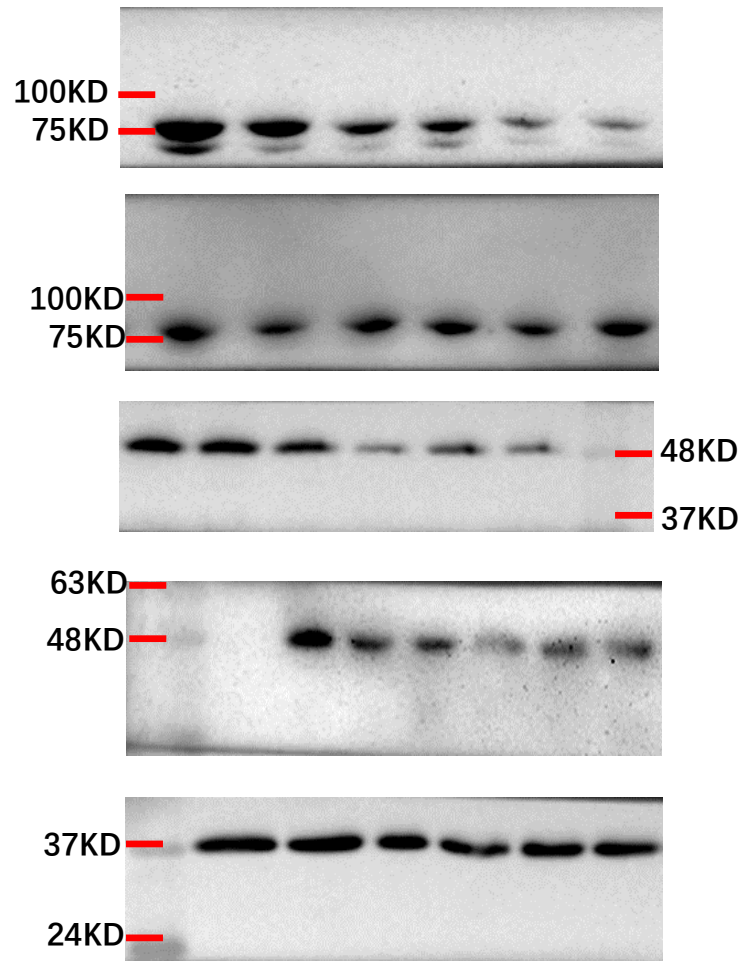

**H1299**

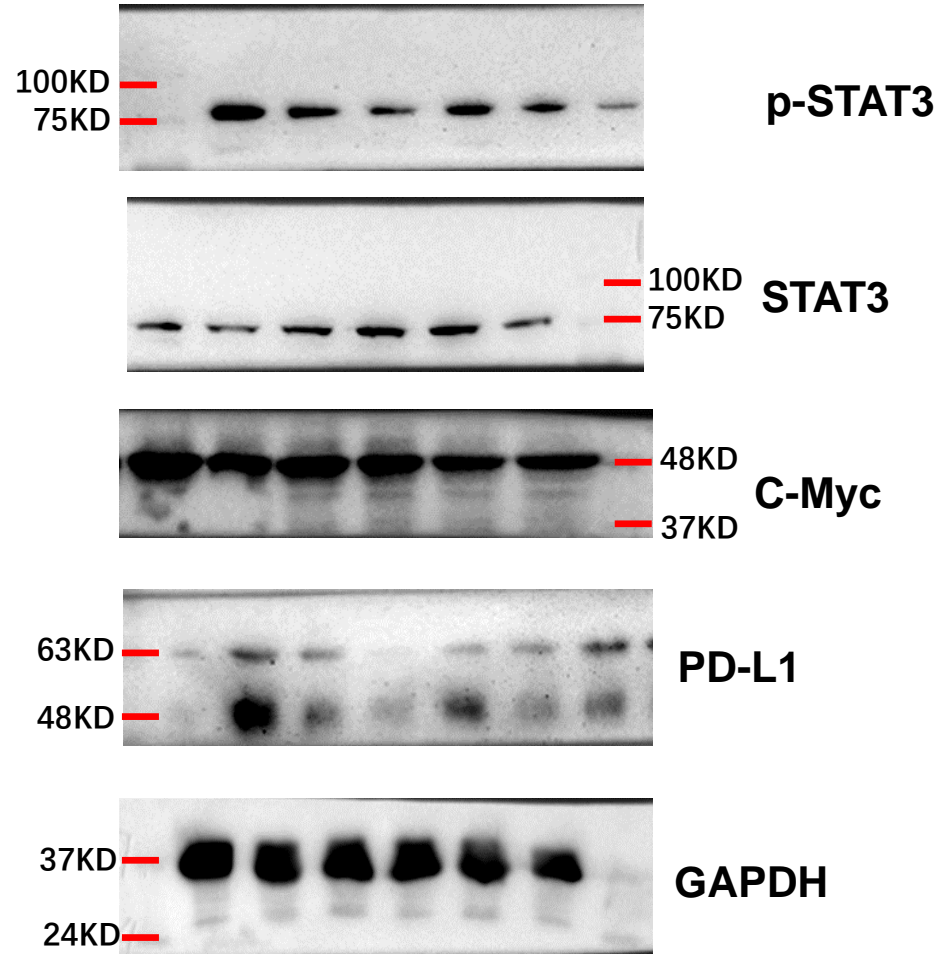

**Supplementary. Raw data for the blots included in each figure.**

**For Figure 5C.**

**A549**

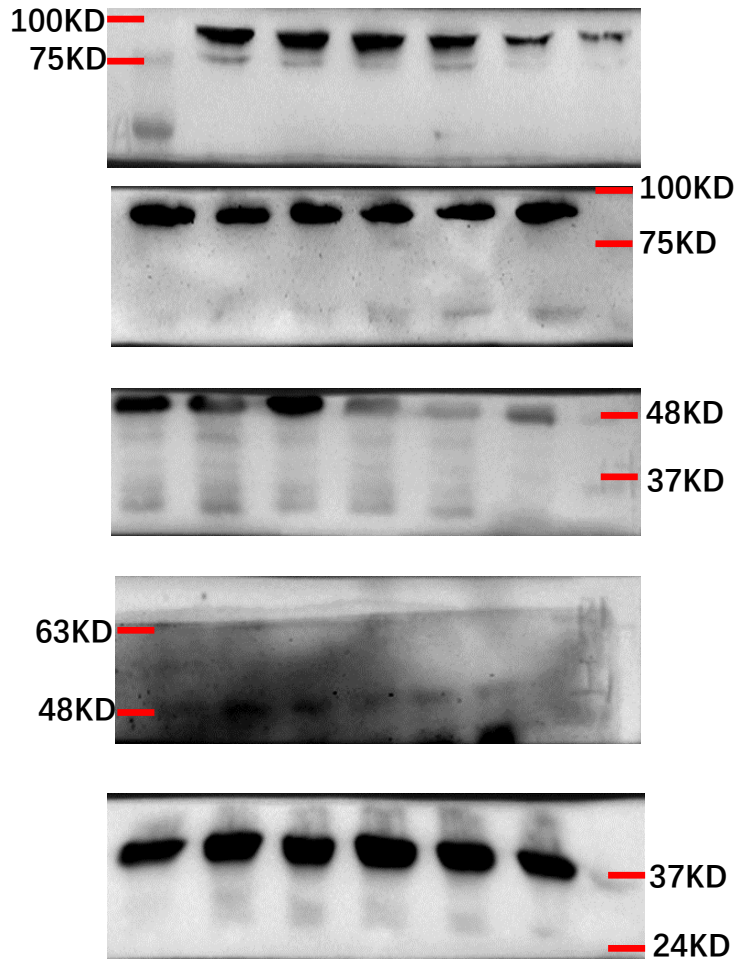

**H1299**

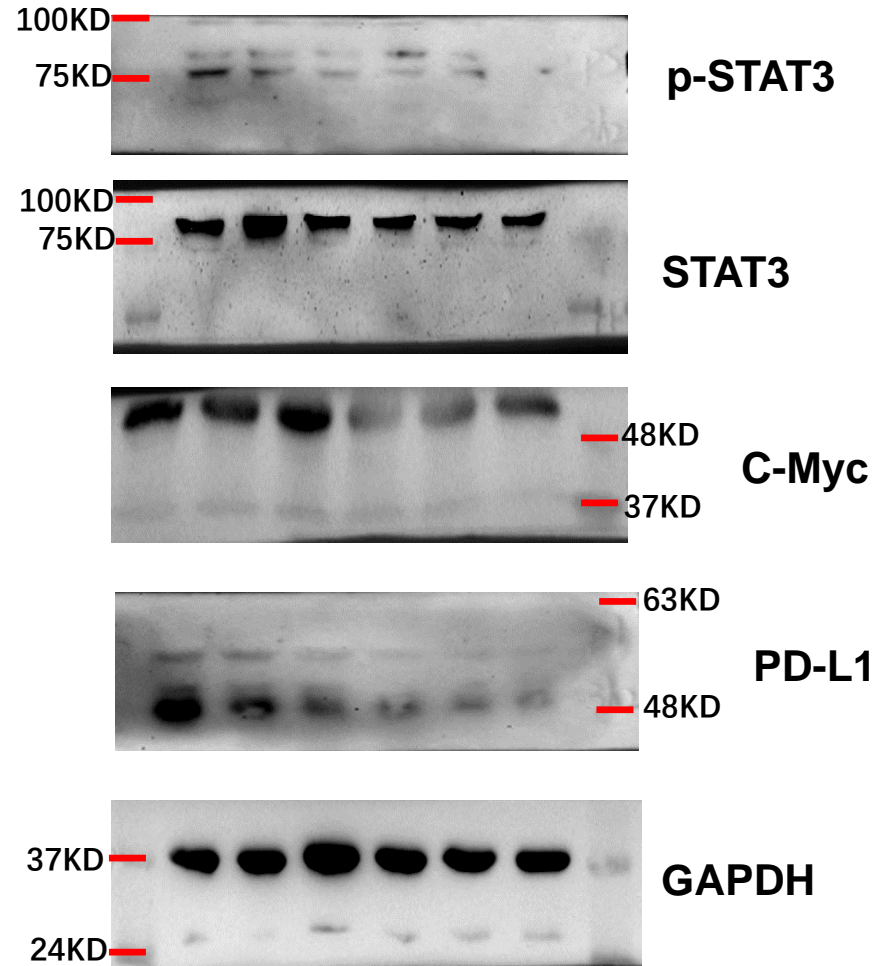



**Supplementary. Raw data for the blots included in each figure.**

**For Figure 5E.**

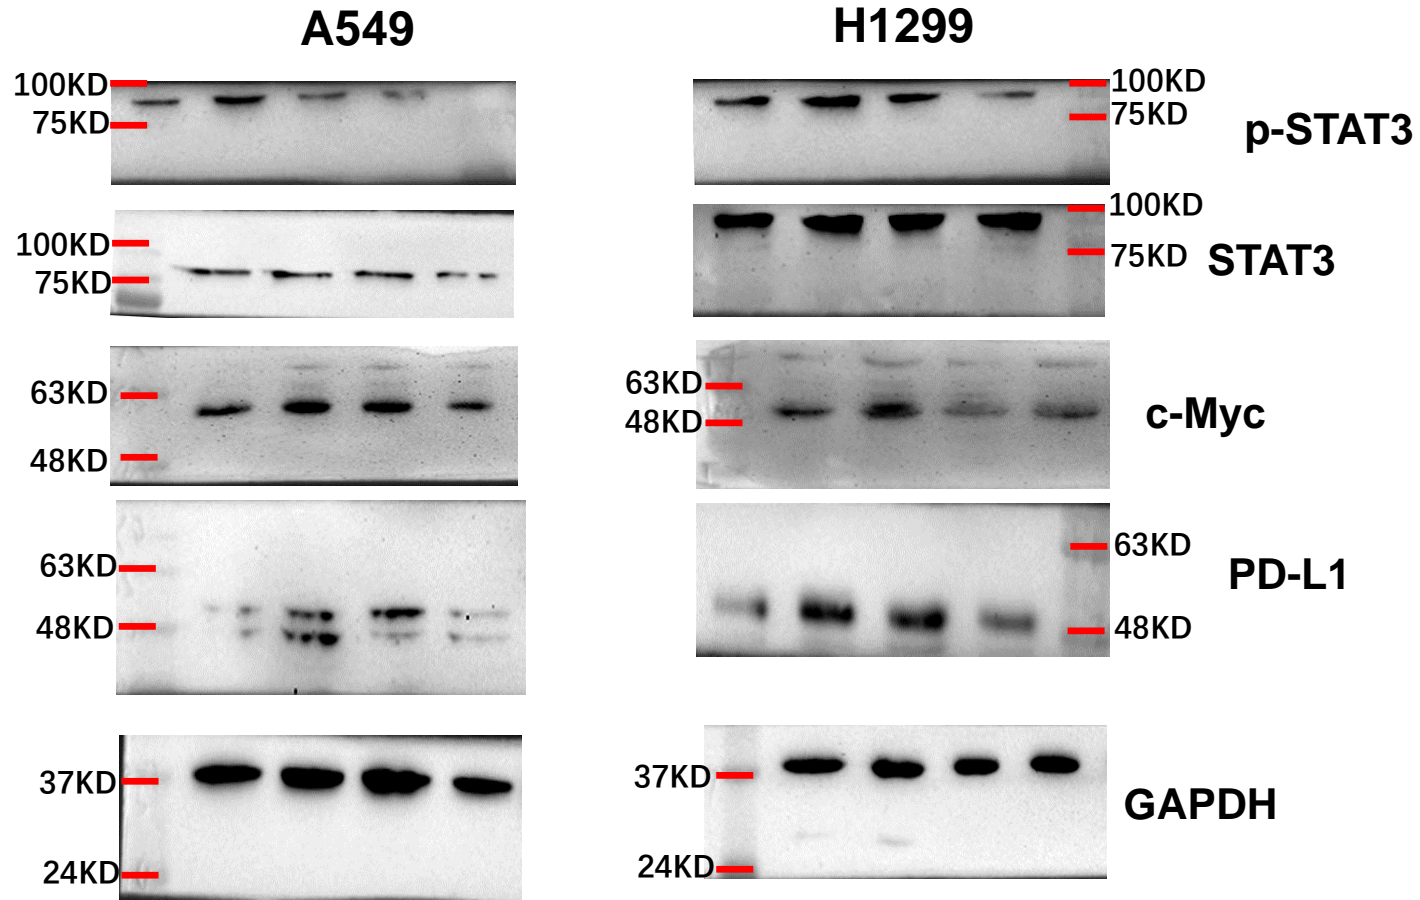

**For Figure 5F.**

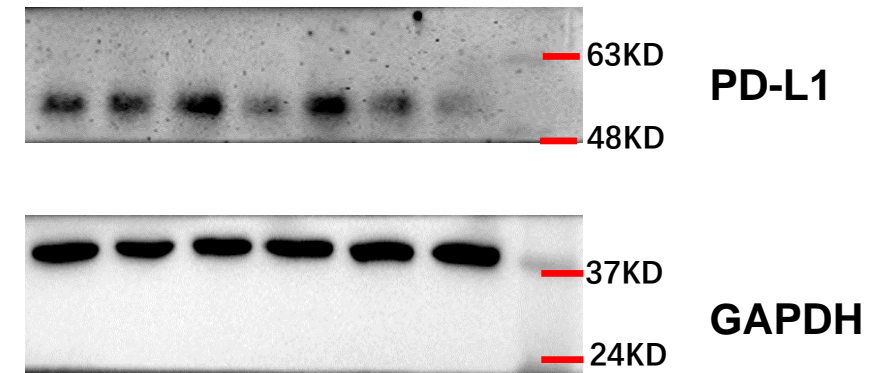

**Supplementary. Raw data for the blots included in each figure.**

**For Figure 6B.**

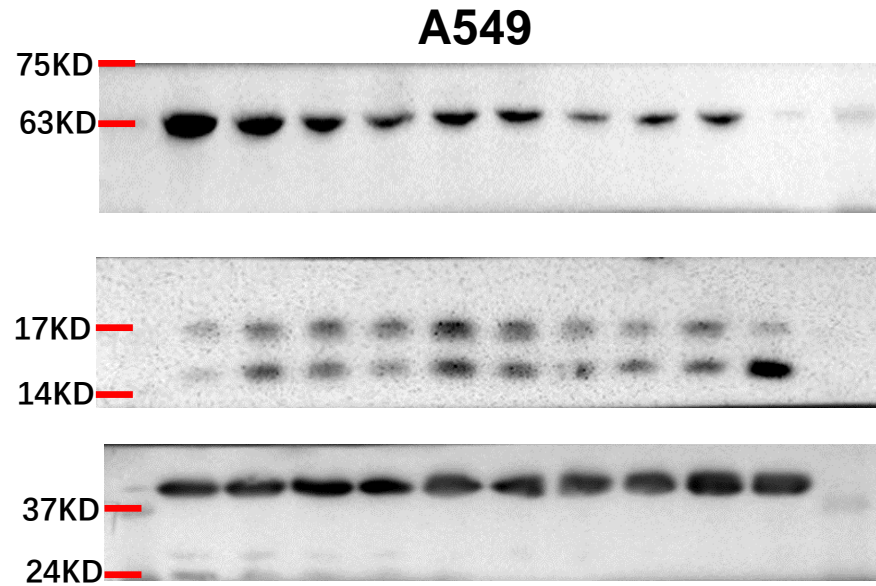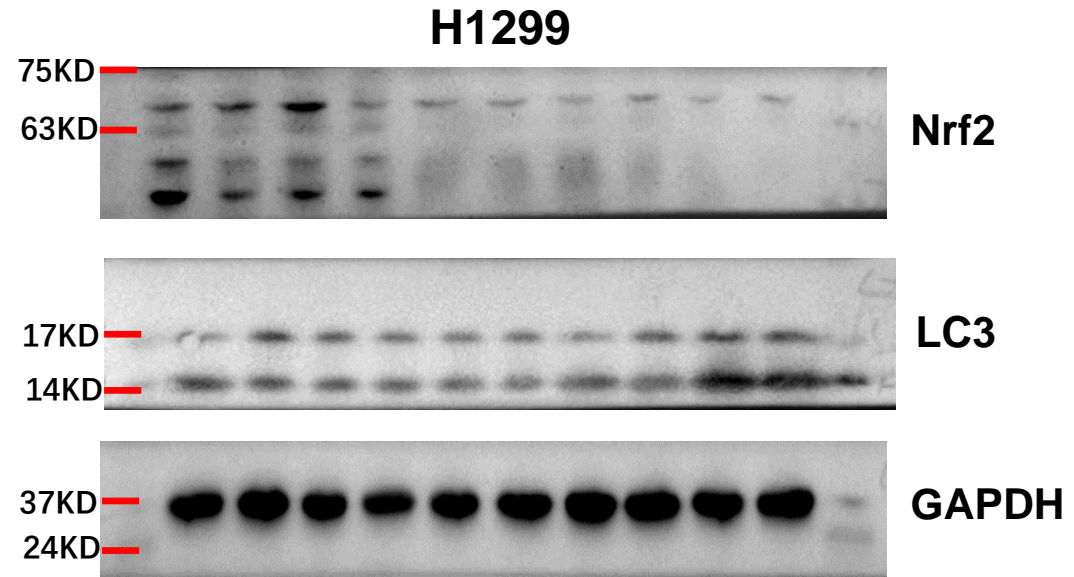

Supplementary. Raw data for the blots included in each figure.

For Figure 6C.

For Figure 6G.

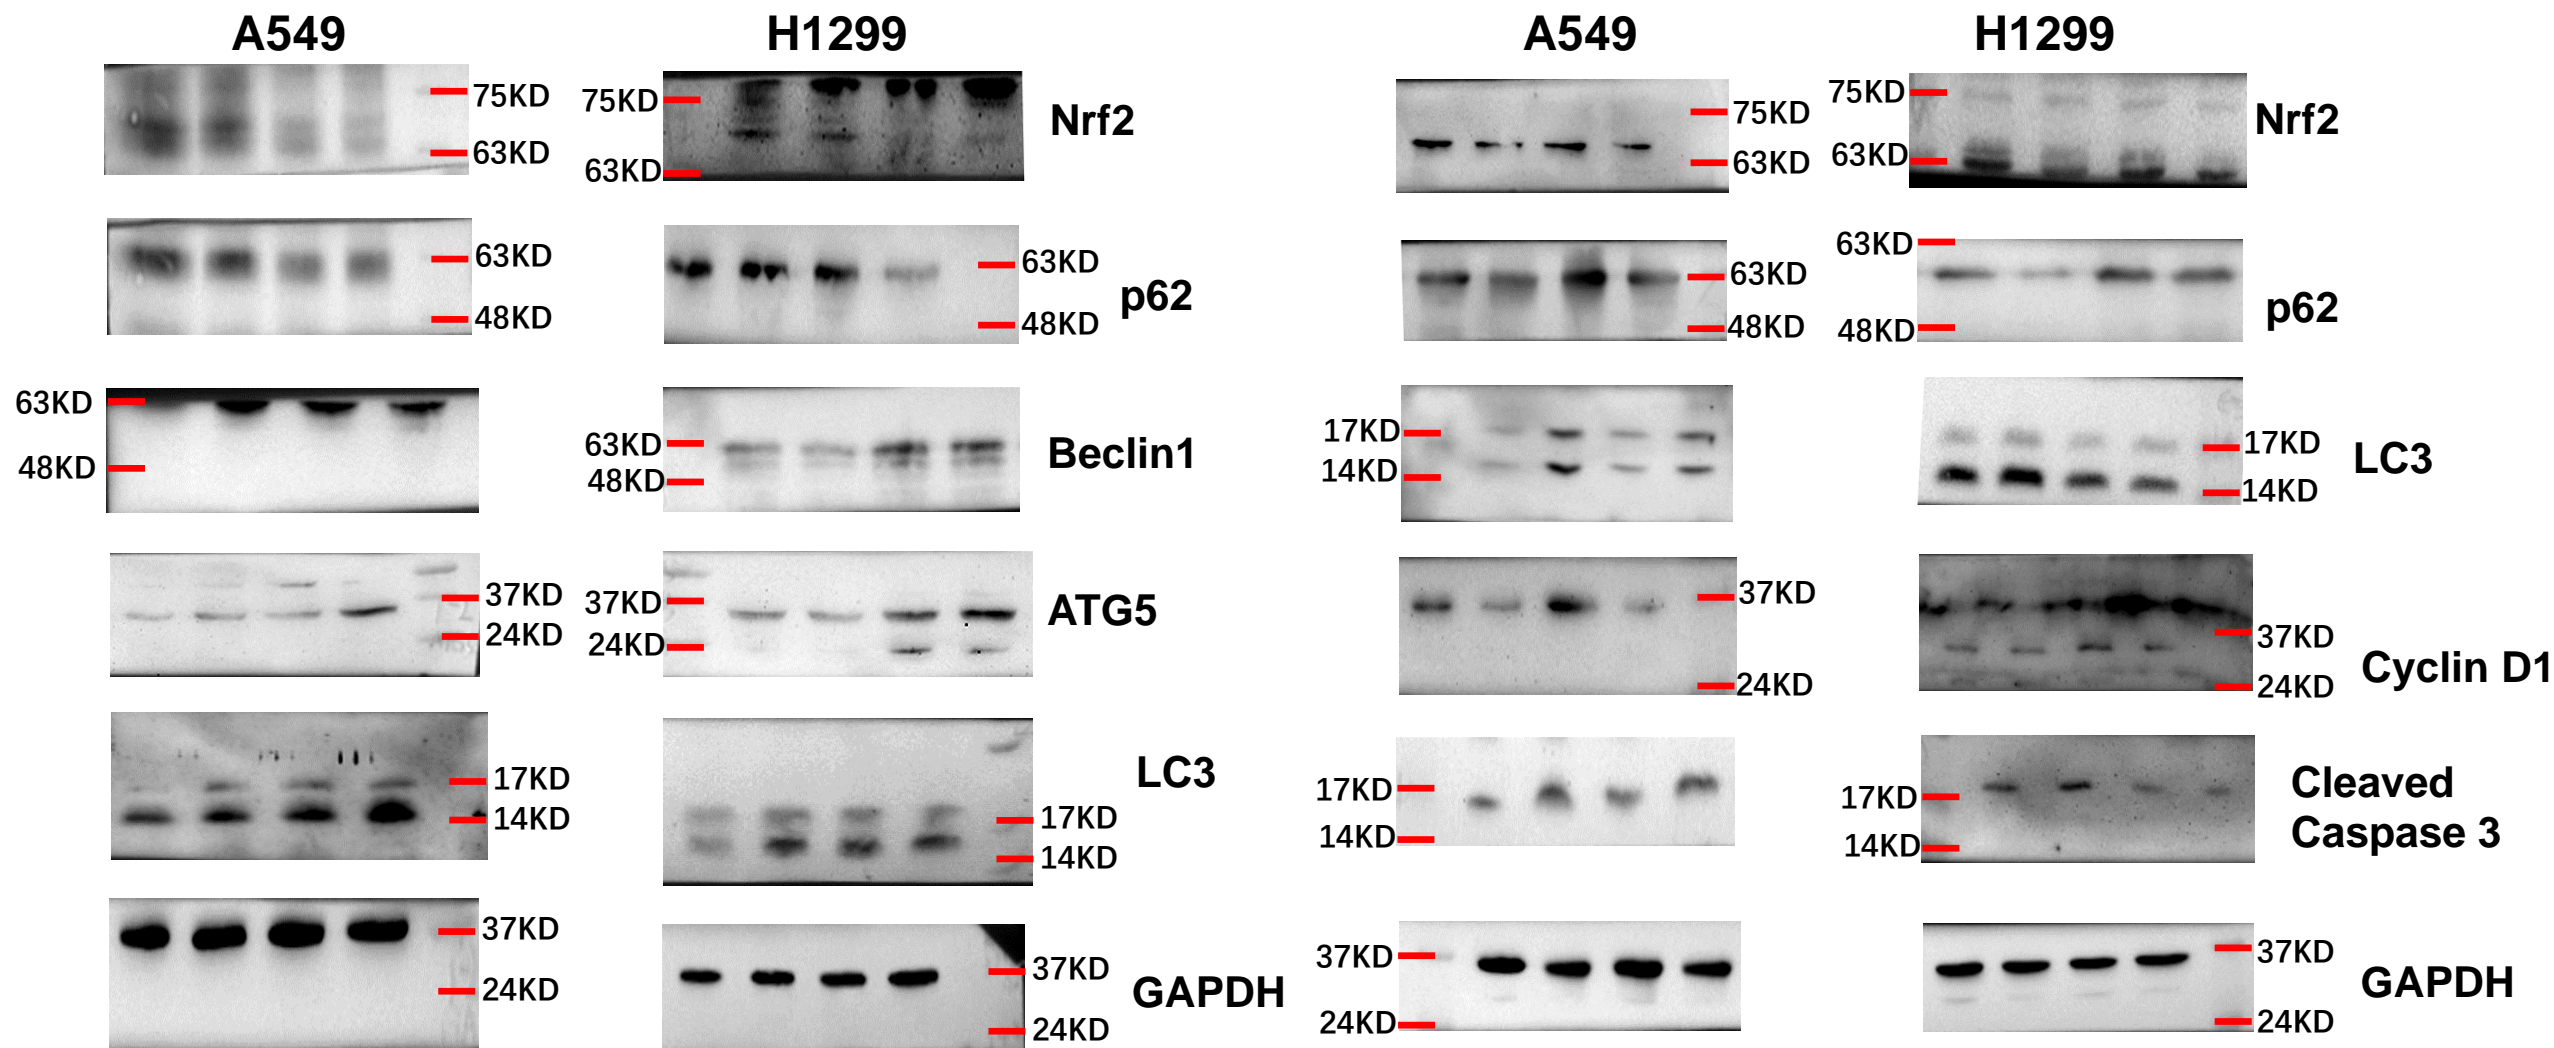



**Supplementary. Raw data for the blots included in each figure.**

**For Figure 6B.**

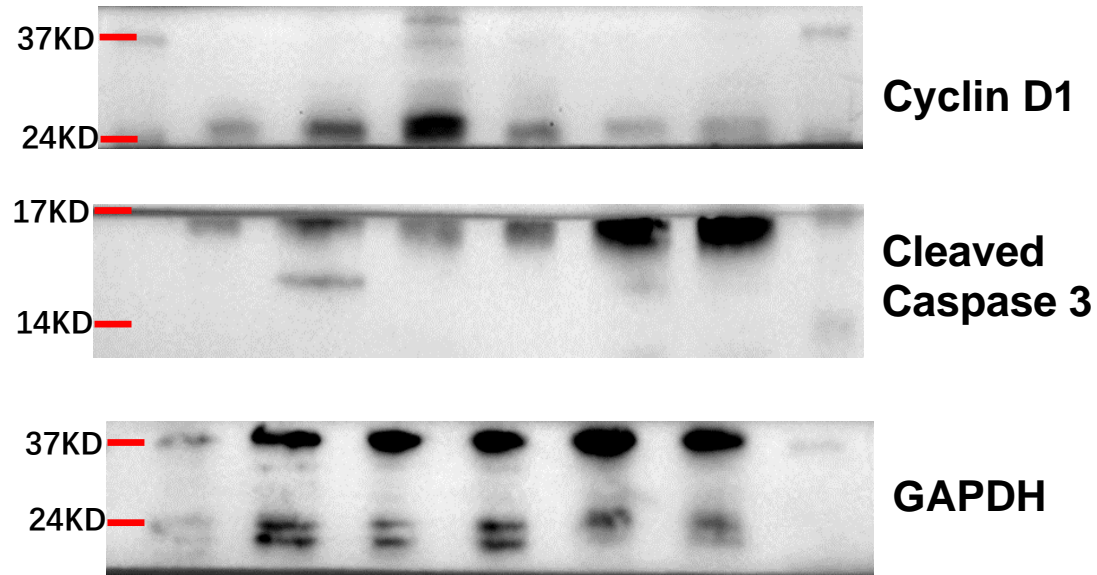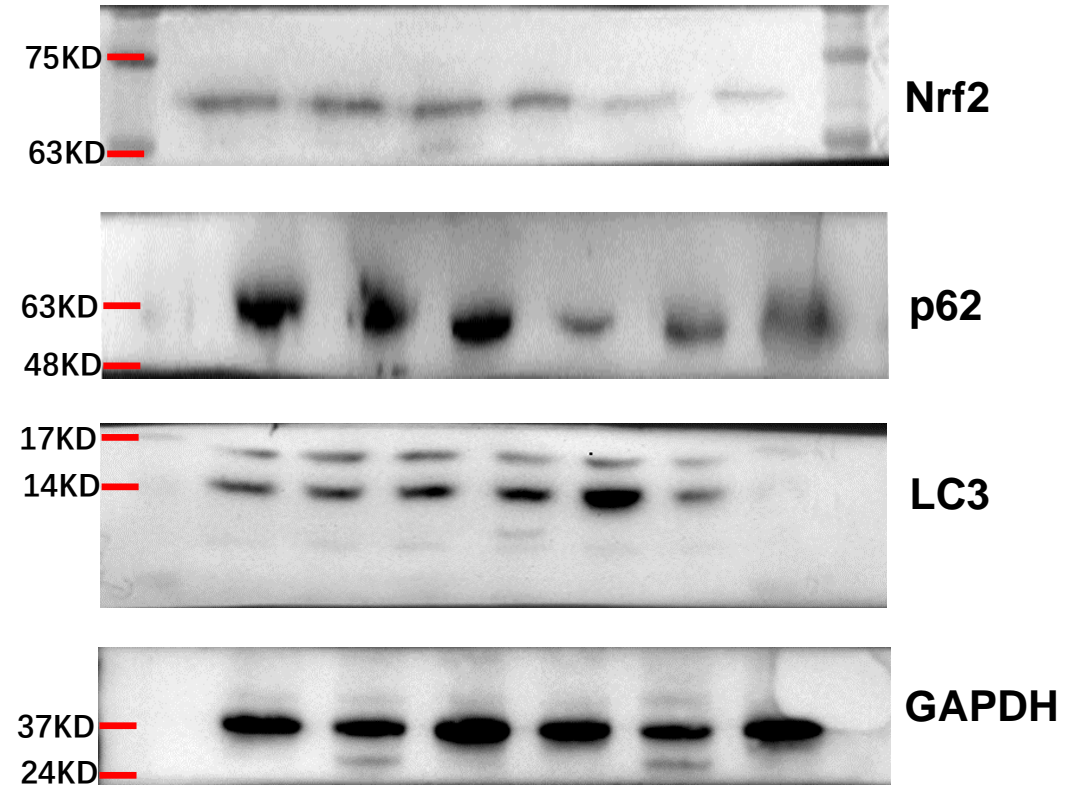

Supplement: 13046_2021_2069_MOESM1_ESM.pdf [file 13046_2021_2069_MOESM1_ESM.pdf]
